# Supplementary material
Source: HighWire-hosted journal article supplement (http://molpharm.aspetjournals.org/highwire/filestream/76889/field_highwire_adjunct_files/0/MOL_67454_SUPP_TABLE_1.pdf)
Supplement: MOL_67454_SUPP_TABLE_1.pdf [file MOL_67454_SUPP_TABLE_1.pdf]

Quantification of functional selectivity at the human  $\alpha_{1A}$ -adrenoceptor

Bronwyn A. Evans, Natalie Broxton, Jon Merlin, Masaaki Sato, Dana S. Hutchinson, Arthur Christopoulos and Roger J. Summers

MOLECULAR PHARMACOLOGY, MS #67454

Table and legend on next page.

SUPPLEMENTAL TABLE 1. Statistical significance of signaling bias at the  $\alpha_{1A}$ -AR.

| AGONIST        | logTR [Ca <sup>2+</sup> ]<br>(n=6) | logTR [cAMP]<br>(n=5) | logTR [ECAR]<br>(n=4) | logTR [cAMP–Ca <sup>2+</sup> ] <sup>b</sup> | logTR [ECAR–cAMP]                    | logTR [ECAR–Ca <sup>2+</sup> ]        |
|----------------|------------------------------------|-----------------------|-----------------------|---------------------------------------------|--------------------------------------|---------------------------------------|
| Norepinephrine | 8.46 ± 0.14                        | 5.48 ± 0.11           | 7.48 ± 0.11           | <b>-2.98 ± 0.17<sup>a</sup> (ref)</b>       | <b>2.00 ± 0.15<sup>a</sup> (ref)</b> | <b>-0.98 ± 0.18<sup>a</sup> (ref)</b> |
| Methoxamine    | 7.24 ± 0.14                        | 4.27 ± 0.13           | 6.87 ± 0.11           | -2.97 ± 0.19 (ns)                           | 2.60 ± 0.17 (P<0.05)                 | -0.38 ± 0.18 (ns)                     |
| Phenylephrine  | 7.94 ± 0.14                        | 4.76 ± 0.14           | 8.27 ± 0.12           | -3.18 ± 0.20 (ns)                           | 3.52 ± 0.18 (P<0.001)                | 0.33 ± 0.18 (P<0.01)                  |
| Oxymetazoline  | 8.52 ± 0.15                        | na                    | 8.46 ± 0.12           | na                                          | na                                   | -0.07 ± 0.19 (P<0.05)                 |
| Cirazoline     | 8.57 ± 0.14                        | 6.46 ± 0.22           | 8.10 ± 0.11           | -2.11 ± 0.26 (P<0.05)                       | 1.64 ± 0.25 (ns)                     | -0.47 ± 0.18 (ns)                     |
| A61603         | 9.58 ± 0.15                        | 7.54 ± 0.12           | 9.03 ± 0.11           | -2.05 ± 0.19 (P<0.01)                       | 1.49 ± 0.16 (ns)                     | -0.56 ± 0.19 (ns)                     |

  

| AGONIST        | logTR [Ca <sup>2+</sup> ]<br>(n=9) | logTR [cAMP]<br>(n=7) | logTR [ECAR]<br>(n=8) | logTR [cAMP–Ca <sup>2+</sup> ] <sup>b</sup> | logTR [ECAR–cAMP]                    | logTR [ECAR–Ca <sup>2+</sup> ]        |
|----------------|------------------------------------|-----------------------|-----------------------|---------------------------------------------|--------------------------------------|---------------------------------------|
| Norepinephrine | 8.78 ± 0.09                        | 5.59 ± 0.08           | 7.49 ± 0.09           | <b>-3.19 ± 0.12<sup>a</sup> (ref)</b>       | <b>1.90 ± 0.12<sup>a</sup> (ref)</b> | <b>-1.29 ± 0.13<sup>a</sup> (ref)</b> |
| Epinephrine    | 9.33 ± 0.08                        | 5.78 ± 0.08           | 7.94 ± 0.09           | -3.55 ± 0.12 (ns)                           | 2.16 ± 0.12 (ns)                     | -1.39 ± 0.12 (ns)                     |

LogTR is the log of the transduction ratio ( $\tau/K_A$ ).

<sup>a</sup>SEM for logTR[pathway 1] – logTR[pathway 2] is calculated as  $\sqrt{((SEM:\logTR[\text{pathway 1}])^2 + (SEM:\logTR[\text{pathway 2}])^2)}$ .

<sup>b</sup>LogTR[pathway 1] – logTR[pathway 2] values are the raw values for each agonist, without correction for norepinephrine.

Unpaired Student's t-tests were carried out to determine whether the logTR[pathway 1] – logTR[pathway 2] value for each agonist was significantly different from the logTR[pathway 1] – logTR[pathway 2] value for the reference agonist norepinephrine (shown in bold).

na, not applicable.
